# Supplementary material
Source: PubMed Central journal article supplement (PMC1440831)
Supplement: 7601067s1.pdf [file 7601067s1.pdf]

**Supplementary Figure: VHS-GAT-GFP but not GGA1-GFP inhibits the removal of Sx6 from maturing ISGs.** Experimental setup as in Fig. 4, except VAMP4-Flag is replaced by Sx6 and probed with anti-Sx6 Ab (red in **A** and **B**, blue in **C** and **D**). (**A and B**), bar= 5 $\mu$ m, (**C and D**), bar= 2 $\mu$ m. Arrow, ACTH colocalizing with Sx6 at cell tip.

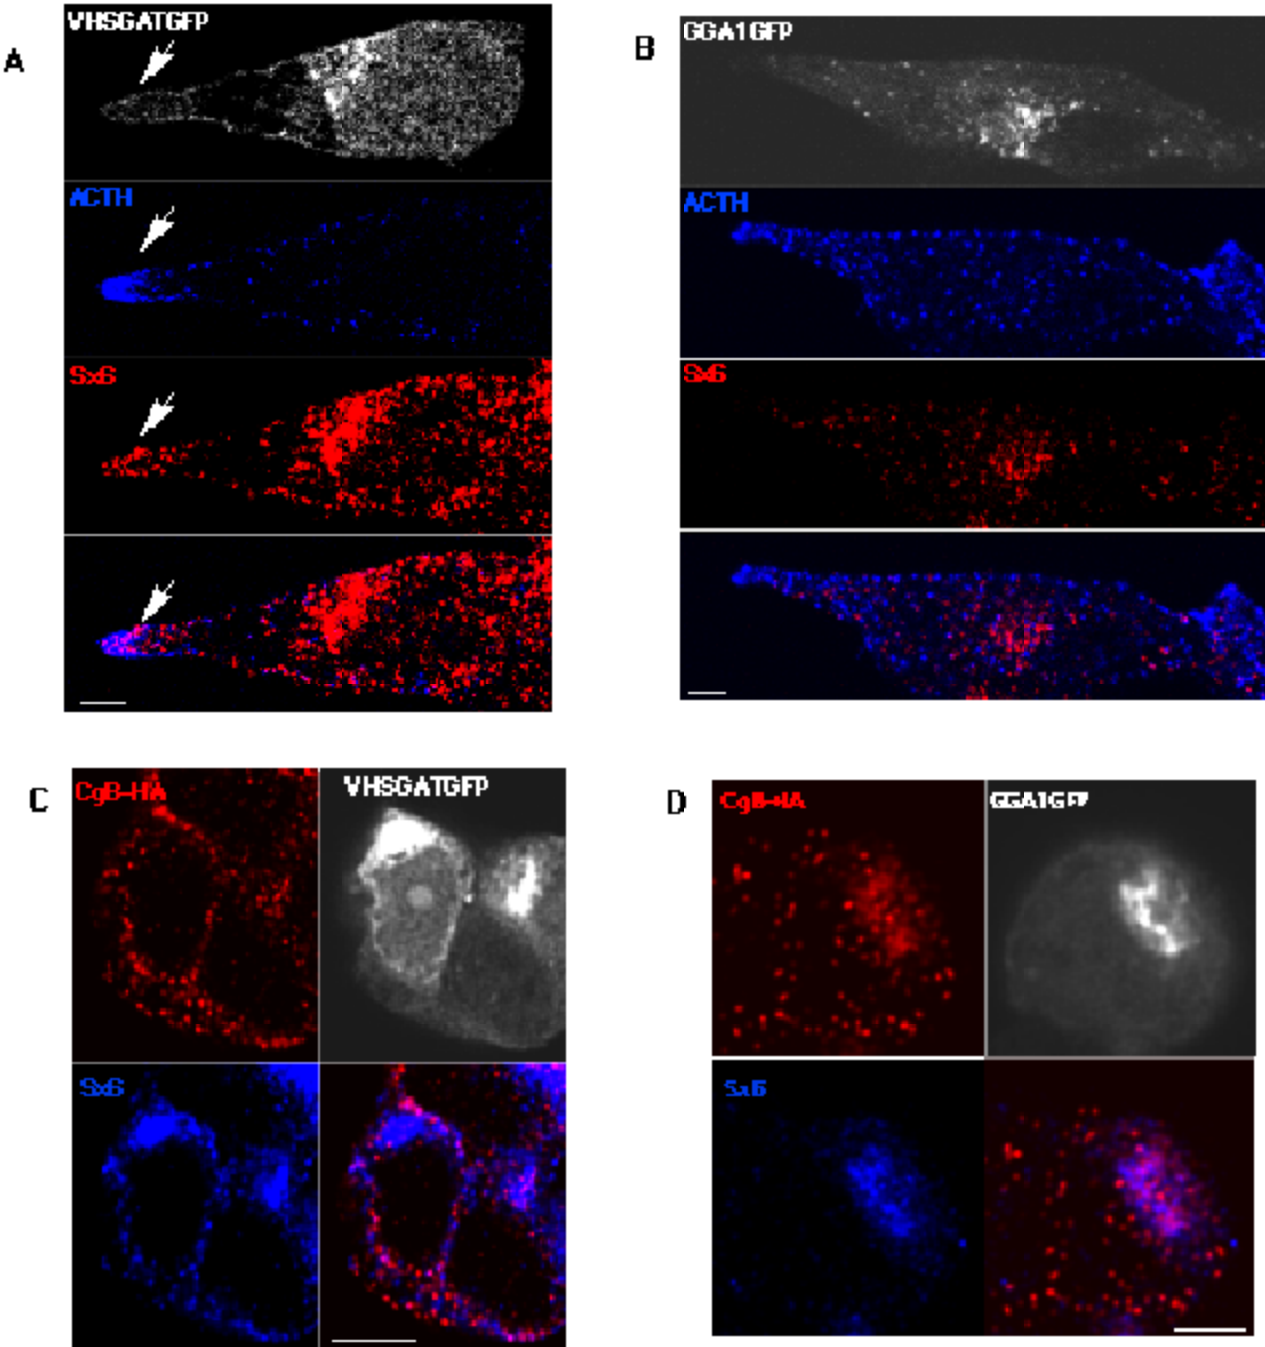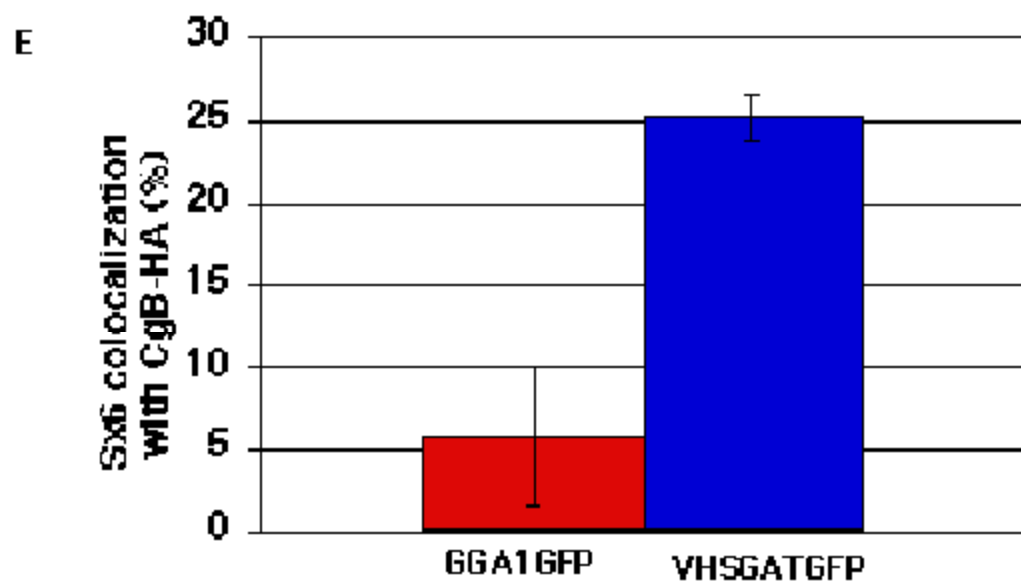

Figure 5
